# Supplementary material
Source: PubMed Central journal article supplement (PMC240694)

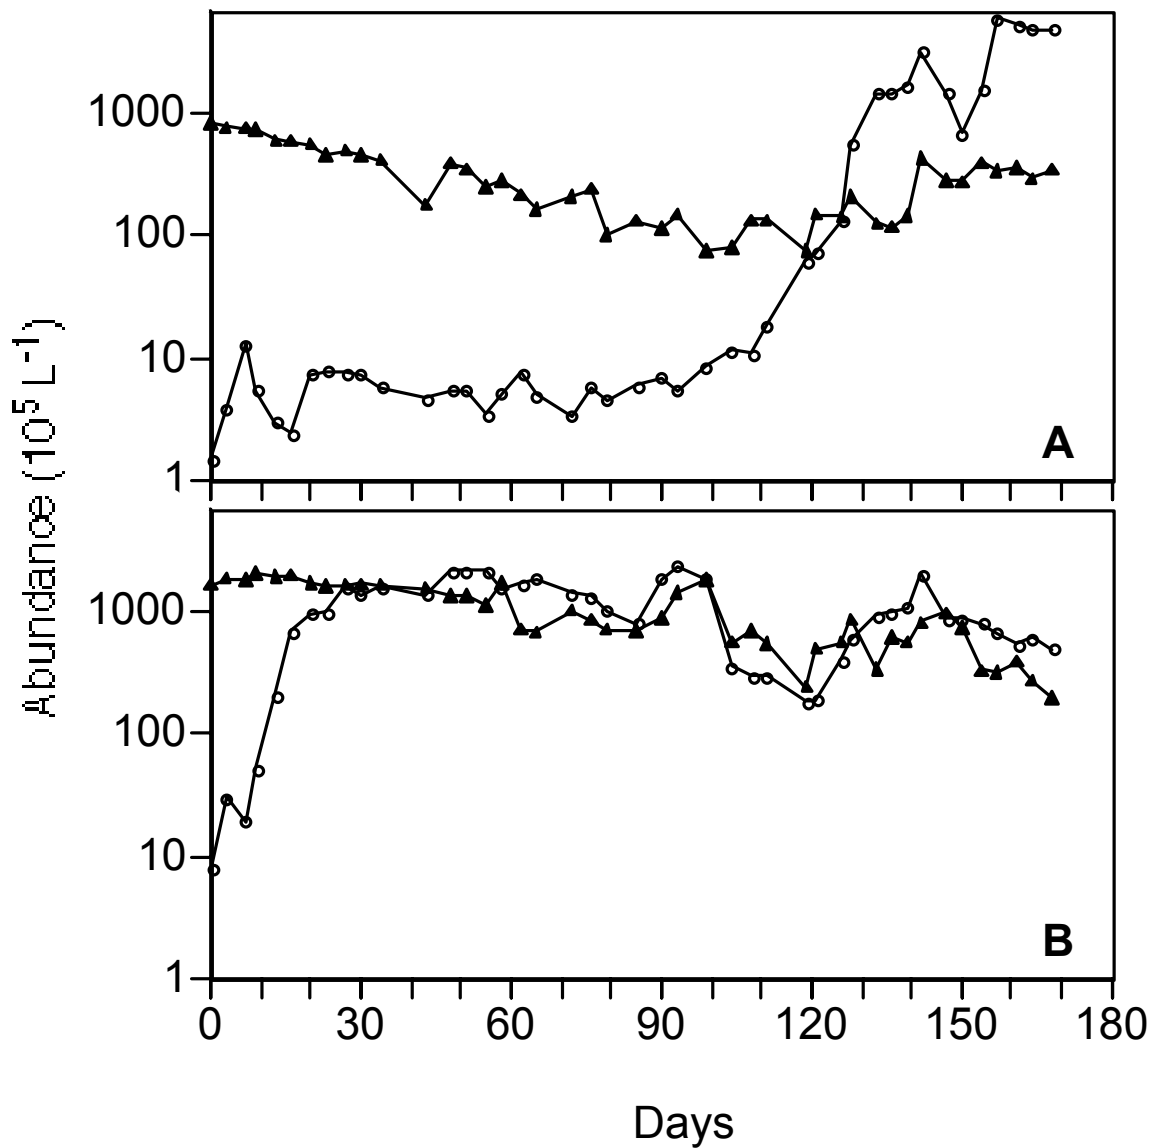

Supplement: pnas_100_22_12776__4.pdf [file pnas_100_22_12776__4.pdf]
